# Supplementary material for: Data-Driven Subtyping of Parkinson’s Disease Using Longitudinal Clinical Records: A Cohort Study
Source: PubMed Central journal article supplement (PMC6349906; doi:10.1038/s41598-018-37545-z), 2019-01-28
Supplement: 41598_2018_37545_MOESM1_ESM.pdf [file 41598_2018_37545_MOESM1_ESM.pdf]

## Supplementary Online Content

# Data-Driven Subtyping of Parkinson's Disease Using Longitudinal Clinical Records: A Cohort Study

Xi Zhang, PhD<sup>1</sup>, Jingyuan Chou, MS<sup>1</sup>, Jian Liang, PhD<sup>2</sup>, Cao Xiao, PhD<sup>3</sup>, Yize Zhao, PhD<sup>1</sup>, Harini Sarva, MD<sup>4</sup>, Claire Henchcliffe, MD, DPhil<sup>4</sup>, Fei Wang, PhD<sup>1</sup>

<sup>1</sup>Department of Healthcare Policy and Research. Weill Cornell Medical College, New York, NY, USA

<sup>2</sup>Department of Automation. Tsinghua University. Beijing. China.

<sup>3</sup>AI for Healthcare. IBM Research. Cambridge. MA. USA.

<sup>4</sup>Department of Neurology, Weill Cornell Medical College, New York, NY, USA

### Corresponding Author:

Fei Wang, PhD  
Department of Healthcare Policy and Research  
Weill Cornell Medicine  
425 East 61 Street, Suite 301  
New York, NY 06032  
Phone: +1 646 962 9405  
[few2001@med.cornell.edu](mailto:few2001@med.cornell.edu)

This supplementary material has been provided by the authors to give readers additional information about their work.

**Table 1: The details of target variables**

|    | Variable Name                                                                          |
|----|----------------------------------------------------------------------------------------|
| 1  | Clinical Diagnosis                                                                     |
| 2  | Demographics                                                                           |
| 3  | Motor symptoms: MDS-UPDRS scores*                                                      |
| 4  | Cognitive Assessments: MoCA*                                                           |
| 5  | Cognitive Categorization: Normal Cognition; Mild Cognitive Impairment; Dementia        |
| 6  | Other nonmotor variable: REM* Sleep Disorder                                           |
| 7  | Biospecimen: Lumber Puncture Sample Collection                                         |
| 8  | Biospecimen: Laboratory Procedures containing DNA, RNA, Urine, Plasma, & Serum samples |
| 9  | Imaging Results: DaTScan Striatal Binding Ratio                                        |
| 10 | Imaging Results: Magnetic Resonance Imaging                                            |

\* Abbreviations: MDS-UPDRS: Movement Disorders Society–revised Unified Parkinson's Disease Rating Scale; MoCA: Montreal Cognitive Assessment; REM: rapid eye movement

**Table 2: Comparisons of p-values obtained by clustering different representation learning methods. The significant characteristics with p-value<.05 over 6-year follow-up as well as the progression during 6 years are marked by √**

|                    | Target Features Subtyping |             | All Features Subtyping |             | LSTM Representation Subtyping |             |
|--------------------|---------------------------|-------------|------------------------|-------------|-------------------------------|-------------|
|                    | 6-Year Follow-up          | Progression | 6-Year Follow-up       | Progression | 6-Year Follow-up              | Progression |
| Age onset          | √                         |             | √                      |             | √                             |             |
| Education          |                           |             | √                      |             |                               |             |
| H&Y Stage          | √                         | √           | √                      |             | √                             | √           |
| MDS-UPDRS Part I   | √                         | √           |                        | √           | √                             | √           |
| MDS-UPDRS Part II  | √                         | √           |                        |             | √                             | √           |
| MDS-UPDRS Part III | √                         |             | √                      |             |                               | √           |
| MDS-UPDRS Part IV  |                           |             |                        | √           |                               |             |
| MoCA               | √                         | √           |                        |             | √                             | √           |
| BJLO               | √                         |             |                        |             | √                             | √           |
| ESS                |                           |             |                        |             | √                             |             |
| RBD                | √                         |             |                        | √           | √                             | √           |
| GDS                | √                         | √           |                        | √           | √                             | √           |
| HVLT               | √                         | √           |                        | √           | √                             | √           |
| LNS                | √                         | √           |                        |             | √                             | √           |
| SCOPA-AUT          | √                         |             |                        |             | √                             |             |
| Semantic Fluency   | √                         |             |                        |             |                               | √           |
| STAI               |                           |             |                        |             | √                             |             |
| SDM                | √                         |             |                        |             | √                             | √           |
| CSF Total tau      |                           |             |                        |             | √                             |             |
| CSF Abeta 42       |                           |             | √                      |             | √                             |             |
| DaTScan Caudate    | √                         | √           |                        |             | √                             | √           |
| DaTScan Putamen    | √                         | √           |                        |             | √                             | √           |
| Medication Use     | √                         | √           | √                      | √           | √                             | √           |

\*Abbreviations: MDS-UPDRS: Movement Disorders Society–revised Unified Parkinson's Disease Rating Scale; MoCA: Montreal Cognitive Assessment; BJLO: Benton Judgment of Line Orientation; ESS: Epworth Sleepiness Scale; RBD: Rapid eye movement sleep Behavior Disorder; GDS: Geriatric Depression Scale; HVLT: Hopkin's Verbal Learning Test; LNS: Letter Number Sequencing; SCOPA-AUT: Scales for Outcomes

in Parkinson's disease-AUTomatic symptoms; STAI: State Trait Anxiety Inventory; SDM: Symbol Digit Modalities; CSF: Cerebrospinal fluid; DaTScan SBR: DaTScan Striatal Binding Ratio.

**Table 3: Group Characteristics of patients at their 2nd year in the three subtypes**

|                             | Total         | Subtype I     | Subtype II    | Subtype III   | p-value                                    |
|-----------------------------|---------------|---------------|---------------|---------------|--------------------------------------------|
| H&Y                         | 1.77(0.50)    | 1.68 (0.48)   | 1.54 (0.55)   | 1.95 (0.48)   | <0.0001 <sup>a</sup> , I vs III, II vs III |
| MDS-UPDRS Part I            | 6.84 (4.53)   | 5.43 (3.46)   | 5.25 (4.88)   | 9.05 (4.76)   | <0.0001 <sup>a</sup> , I vs III, II vs III |
| MDS-UPDRS Part II           | 7.56 (4.95)   | 6.03 (3.74)   | 4.78 (3.63)   | 10.23 (5.37)  | <0.0001 <sup>a</sup> , I vs III, II vs III |
| MDS-UPDRS Part III          | 24.61 (10.46) | 21.56 (9.48)  | 21.2 (8.22)   | 29.33 (10.39) | 0.0315 <sup>a</sup> , I vs III, II vs III  |
| MDS-UPDRS Part IV           | 0.93 (1.90)   | 0.76 (1.70)   | 0.17 (0.37)   | 1.19 (2.15)   | 0.8854 <sup>b</sup>                        |
| MoCA                        | 26.14 (3.12)  | 27.17 (2.24)  | 27.33 (1.70)  | 24.95 (3.56)  | 0.4980 <sup>a</sup>                        |
| BJLO                        | 19.18 (6.99)  | 20.96 (7.00)  | 15.88 (5.72)  | 17.32 (6.47)  | 0.0491 <sup>a</sup> , I vs II, I vs III    |
| ESS                         | 6.48 (3.89)   | 5.71 (3.52)   | 3.75 (2.09)   | 6.64 (3.82)   | 0.0063 <sup>a</sup> , I vs III, II vs III  |
| RBD <sup>#</sup>            | 3.30 (2.94)   | 2.45 (2.41)   | 2.00 (2.35)   | 4.86 (3.13)   | 0.0035 <sup>a</sup> , I vs III, II vs III  |
| GDS                         | 5.64 (1.73)   | 5.28 (1.36)   | 5.33 (1.65)   | 6.26 (2.06)   | 0.0016 <sup>a</sup> , I vs III             |
| HVLT                        | 24.05 (5.46)  | 26.41 (4.07)  | 24.5 (4.33)   | 20.29 (5.42)  | <0.0001 <sup>a</sup> , I vs III, II vs III |
| LNS                         | 9.84 (3.53)   | 11.02 (2.93)  | 8.33 (4.19)   | 8.35 (3.56)   | 0.0050 <sup>a</sup> , I vs II, I vs III    |
| QUIP                        | 0.13 (0.37)   | 0.12 (0.36)   | 0.08 (0.28)   | 0.16 (0.40)   | 0.9460 <sup>a</sup>                        |
| SCOPA-AUT                   | 12.47 (6.75)  | 10.17 (5.11)  | 8.83 (5.18)   | 16.67 (7.19)  | 0.0028 <sup>a</sup> , I vs III, II vs III  |
| Semantic Fluency            | 50.09 (13.32) | 53.89 (12.12) | 49.58 (11.14) | 44.28 (13.29) | 0.3445 <sup>a</sup>                        |
| STAI                        | 64.61 (19.16) | 61.34 (16.03) | 56.83 (13.65) | 70.62 (22.33) | 0.5784 <sup>a</sup>                        |
| SDMT                        | 40.20 (10.85) | 32.79 (11.08) | 42.00 (5.46)  | 44.79 (8.13)  | 0.2780 <sup>a</sup>                        |
| Medication Use <sup>#</sup> | 2.01 (1.89)   | 2.31 (1.93)   | 0.29 (0.61)   | 2.05 (1.83)   | <0.0001 <sup>a</sup> , I vs II, II vs III  |

<sup>a</sup>Chi-square test; <sup>b</sup>Fisher exact test. The specific different subtypes determined by use of Tukey post hoc analysis (p<0.05). Abbreviations: H&Y: Hoehn and Yahr; MDS-UPDRS: Movement Disorders Society-revised Unified Parkinson's Disease Rating Scale; MoCA: Montreal Cognitive Assessment; BJLO: Benton Judgment of Line Orientation; ESS: Epworth Sleepiness Scale; RBD: Rapid eye movement sleep Behavior Disorder; GDS: Geriatric Depression Scale; HVLT: Hopkin's Verbal Learning Test; LNS: Letter Number Sequencing; QUIP: Questionnaire for Impulsive-Compulsive Disorders in Parkinson's Disease; SCOPA-AUT: SCAles for Outcomes in PArkinson's disease-AUTomatic symptoms; STAI: State Trait Anxiety Inventory; SDMT: Symbol Digit Modalities Test; MCI: Mild Cognitive Impairment. <sup>#</sup>RBD's rating scale is 0-10; MCI was determined by patients with cognitive declines, no functional impairment, and values of cognitive tests HVLT, BJLO, LNS, Semantic Fluency and SDMT; 1=normal, 2=Abnormal, not clinically significant, 3=Abnormal, clinically significant; Medication Use defined by 0=Unmedicated for PD, 1=Levodopa, 2=Dopamine Agonist, 3=Other, 4=Levodopa & Other, 5=Levodopa & Dopamine Agonist, 6=Dopamine Agonist & Other, 7=Levodopa & Dopamine Agonist & Other.

**Table 4: Characteristics summarization of the learned subtypes**

| Subtype I<br>(43.1%)                   | Subtype II<br>(22.9%)                   | Subtype III<br>(33.9%)                |
|----------------------------------------|-----------------------------------------|---------------------------------------|
| 58.79 years at baseline                | 61.93 years at baseline                 | 65.32 years at baseline               |
| Mild motor symptoms at baseline        | Moderate motor symptoms at baseline     | Severe motor symptoms at baseline     |
| Mild non-motor symptoms at baseline    | Moderate non-motor symptoms at baseline | Severe non-motor symptoms at baseline |
| Moderate motor decline                 | Mild motor decline                      | Severe motor decline                  |
| Stable cognition, moderate RBD decline | Mild non-motor decline                  | Severe non-motor decline              |
| Moderate DaTScan SBR decline           | Mild DaTScan SBR decline                | Severe DaTScan SBR decline            |

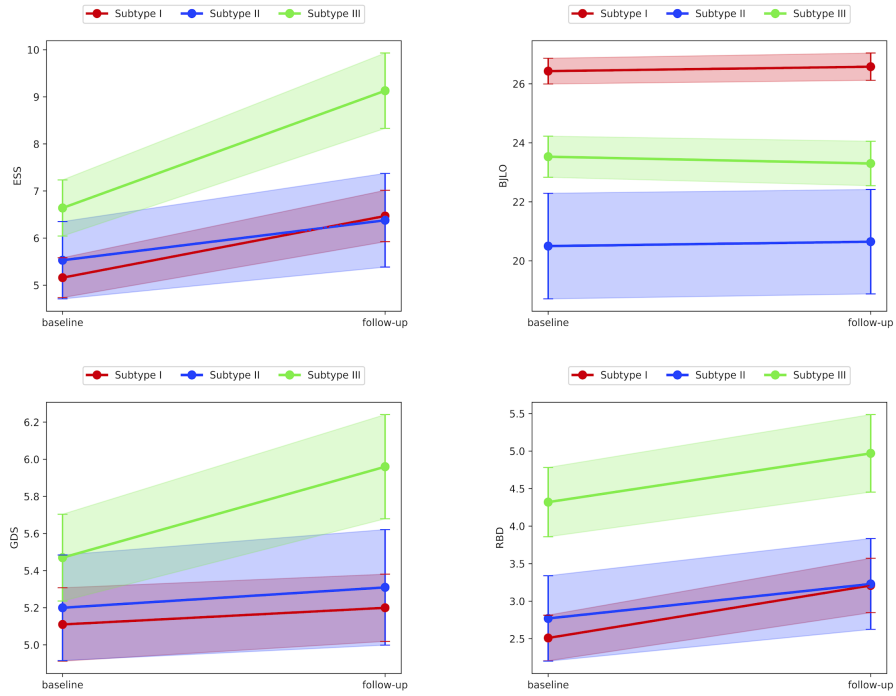

**Figure 1: Comparisons of three subtypes on disease progression of the variables ESS, BJLO, GDS, and RBD.** The time interval between baseline and follow-up is 6 years. The larger slope illustrates a more rapid progression on the corresponding variables. The representative variables with the  $p$ -value $<0.05$  are shown.

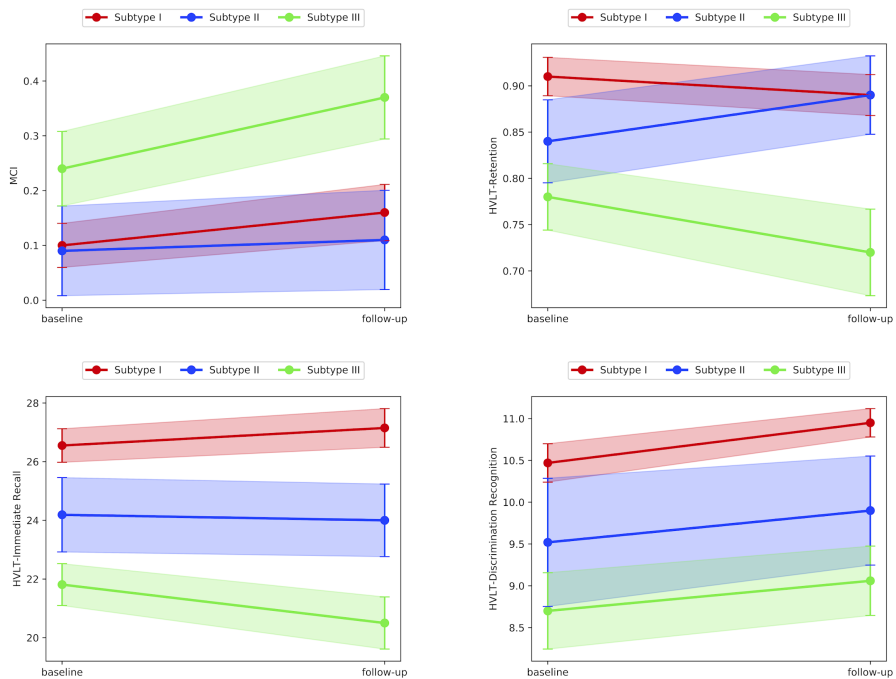

**Figure 2: Comparisons of three subtypes on disease progression of the variables MCI and HVL.** The time interval between baseline and follow-up is 6 years. The larger slope illustrates a more rapid progression on the corresponding variables. The representative variables with the  $p$ -value $<0.05$  are shown.

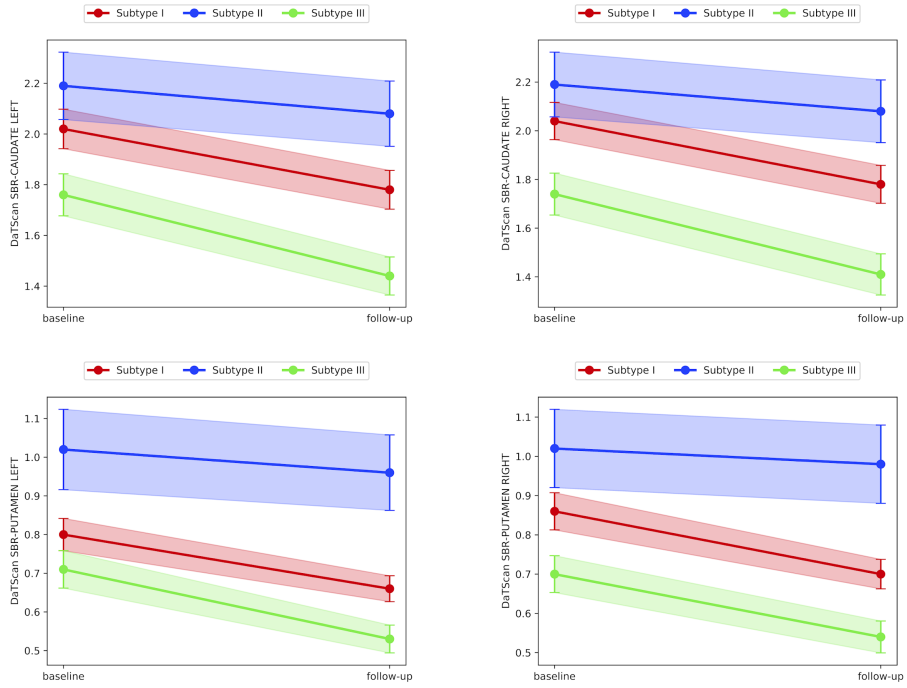

**Figure 3: Comparisons of three subtypes on disease progression of the variables DaTScan Caudate and Putamen.** The time interval between baseline and follow-up is 6 years. The larger slope illustrates a more rapid progression on the corresponding variables. The representative variables with the  $p$ -value $<0.05$  are shown.

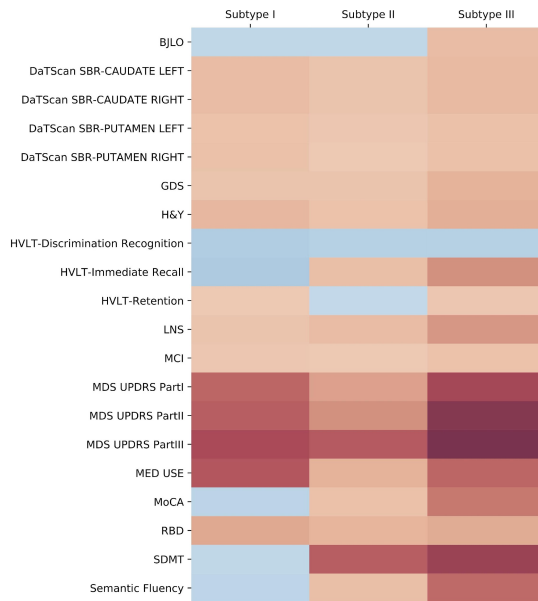

**Figure 4: Heatmap illustration of the first-order difference of mean values for each subtype in LSTM results.** It is obtained by the difference between the mean value of baseline and the mean value of the patients' last records on the variables. The red color represents a worse progression and the blue color shows a better progression on the symptoms of PD. The darker the color is, the significant the trend is. Variables with  $p$ -value $<0.05$  are shown.

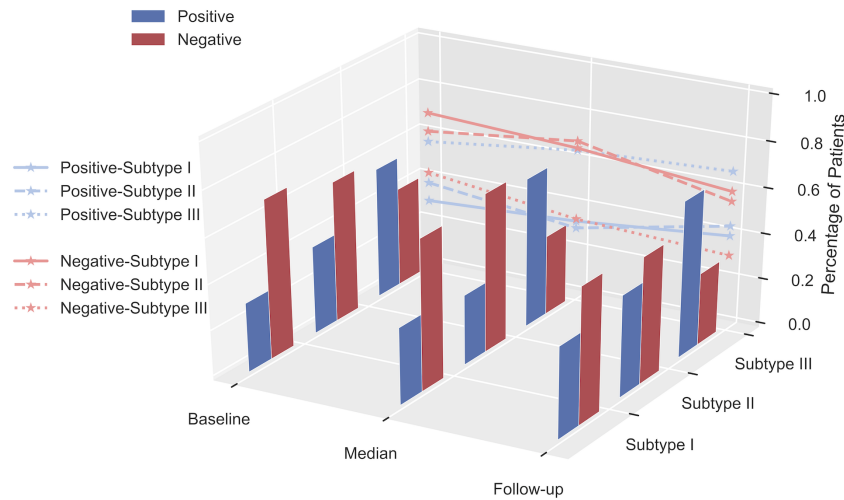

**Figure 5: Patient correlation of three subtypes and RBD subtypes at baseline, median time point, and 6-year follow-up.** Patients are categorized into RBD subtypes including Positive subtype, Negative subtype. The longitudinal correlation of three subtypes with Positive subtype and Negative subtype are plotted by lines respectively.

**Table 5: Multivariate logistic regression model to find discriminant clinical predictors of Subtype I patients at baseline.**

| Age adjusted       |              |                        |                      | Age unadjusted     |              |                       |                           |
|--------------------|--------------|------------------------|----------------------|--------------------|--------------|-----------------------|---------------------------|
| variables          | coefficient  | 95% CI                 | p-value              | variables          | coefficient  | 95% CI                | p-value                   |
| Age                | -1.200       | [-3.083, 0.635]        | 0.2039               |                    |              |                       |                           |
| MDS-UPDRS Part I   | -3.578       | [-5.875, -1.406]       | 0.0016 <sup>#</sup>  | MDS-UPDRS Part I   | -3.500       | [-5.801, -1.325]      | 0.0021 <sup>#</sup>       |
| MDS-UPDRS Part II  | 0.113        | [-2.015, 2.247]        | 0.9168               | MDS-UPDRS Part II  | 0.165        | [-1.950, 2.282]       | 0.8775                    |
| MDS-UPDRS Part III | -0.642       | [-2.968, 1.637]        | 0.5823               | MDS-UPDRS Part III | -0.547       | [-2.871, 1.729]       | 0.6391                    |
| BJLO               | 4.327        | [2.501, 6.339]         | <0.0001 <sup>#</sup> | BJLO               | 4.319        | [2.497, 6.327]        | <0.0001 <sup>#</sup>      |
| ESS                | -1.592       | [-3.449, 0.222]        | 0.0880               | ESS                | -1.560       | [-3.410, 0.249]       | 0.0935                    |
| GDS                | -0.526       | [-2.550, 1.485]        | 0.6075               | GDS                | -0.335       | [-2.315, 1.642]       | 0.7387                    |
| HVLT               | 5.057        | [3.160, 7.087]         | <0.0001 <sup>#</sup> | HVLT               | 5.202        | [3.325, 7.216]        | <0.0001 <sup>#</sup>      |
| LNS                | 0.185        | [-1.923, 2.323]        | 0.8639               | LNS                | 0.463        | [-1.597, 2.559]       | 0.6609                    |
| MoCA               | -0.517       | [-2.328, 1.281]        | 0.5725               | MoCA               | -0.501       | [-2.310, 1.295]       | 0.5843                    |
| QUIP               | 0.028        | [-1.509, 1.534]        | 0.9701               | QUIP               | 0.045        | [-1.485, 1.542]       | 0.9532                    |
| RBD                | -0.969       | [-2.281, 0.322]        | 0.1427               | RBD                | -0.884       | [-2.187, 0.400]       | 0.1788                    |
| SCOPA-AUT          | -1.611       | [-4.055, 0.744]        | 0.1868               | SCOPA-AUT          | -2.052       | [-4.407, 0.209]       | 0.0805                    |
| Semantic Fluency   | 2.227        | [-0.349, 4.840]        | 0.0918               | Semantic Fluency   | 2.288        | [-0.267, 4.882]       | 0.0809                    |
| STAI               | -0.528       | [-2.354, 1.292]        | 0.5688               | STAI               | -0.315       | [-2.091, 1.465]       | 0.7270                    |
| <b>SDM</b>         | <b>2.536</b> | <b>[-0.247, 5.449]</b> | <b>0.0799</b>        | <b>SDM</b>         | <b>3.123</b> | <b>[0.479, 5.907]</b> | <b>0.0237<sup>#</sup></b> |
| CAUDATE.RIGHT*     | -0.713       | [-4.314, 2.877]        | 0.6963               | CAUDATE.RIGHT*     | -0.482       | [-4.067, 3.095]       | 0.7911                    |

|                |        |                 |                     |                |        |                  |                     |
|----------------|--------|-----------------|---------------------|----------------|--------|------------------|---------------------|
| CAUDATE.LEFT*  | 3.173  | [-0.314, 6.734] | 0.0766              | CAUDATE.LEFT*  | 3.022  | [-0.449, 6.557]  | 0.0897              |
| PUTAMEN.RIGHT* | 1.329  | [-1.739, 4.447] | 0.3982              | PUTAMEN.RIGHT* | 1.171  | [-1.872, 4.258]  | 0.4527              |
| PUTAMEN.LEFT*  | -4.076 | [-7.603,-0.563] | 0.0222 <sup>#</sup> | PUTAMEN.LEFT*  | -4.016 | [-7.535, -0.501] | 0.0241 <sup>#</sup> |
| Duration       | -1.131 | [-2.666, 0.387] | 0.1442              | Duration       | -1.201 | [-2.737, 0.317]  | 0.1210              |
| Education      | -1.590 | [-3.825, 0.597] | 0.1571              | Education      | -1.771 | [-3.985, 0.390]  | 0.1111              |
| H&Y            | 0.301  | [-0.386, 1.006] | 0.3947              | HY             | 0.255  | [-0.426, 0.953]  | 0.4661              |
| MCI            | 0.049  | [-0.780, 0.873] | 0.9055              | MCI            | 0.021  | [-0.807, 0.844]  | 0.9584              |
| Gender         | -0.074 | [-0.739, 0.585] | 0.8240              | Gender         | -0.055 | [-0.721, 0.605]  | 0.8696              |

<sup>#</sup> Statistical significant correlation (p-value<0.05); \* LEFT/RIGH means left/right Caudate or Putamen; Bold variables are p-values changed from significant (not significant) to not significant (significant), with/without Age adjustment.

**Table 6: Multivariate logistic regression model to find discriminant clinical predictors of Subtype II patients at baseline.**

| variables          | Age adjusted |                  |                      | variables          | Age unadjusted |                  |                      |
|--------------------|--------------|------------------|----------------------|--------------------|----------------|------------------|----------------------|
|                    | coefficient  | 95% CI           | p-value              |                    | coefficient    | 95% CI           | p-value              |
| Age                | 0.680        | [-1.889, 3.340]  | 0.6075               |                    |                |                  |                      |
| MDS-UPDRS Part I   | 3.941        | [0.905, 7.050]   | 0.0112 <sup>#</sup>  | MDS-UPDRS Part I   | 3.851          | [0.829, 6.962]   | 0.0130 <sup>#</sup>  |
| MDS-UPDRS Part II  | -3.886       | [-7.620,-0.613]  | 0.0281 <sup>#</sup>  | MDS-UPDRS Part II  | -3.846         | [-7.589, -0.574] | 0.0300 <sup>#</sup>  |
| MDS-UPDRS Part III | -0.414       | [-4.020, 3.078]  | 0.8181               | MDS-UPDRS Part III | -0.419         | [-4.018, 3.065]  | 0.8153               |
| BJLO               | -3.508       | [-5.680,-1.413]  | 0.0011 <sup>#</sup>  | BJLO               | -3.547         | [-5.721, -1.452] | 0.0010 <sup>#</sup>  |
| ESS                | 1.196        | [-1.169, 3.552]  | 0.3162               | ESS                | 1.163          | [-1.198, 3.512]  | 0.3288               |
| GDS                | -0.093       | [-2.991, 2.716]  | 0.9484               | GDS                | -0.213         | [-3.080, 2.573]  | 0.8814               |
| HVLT               | -1.869       | [-4.429, 0.623]  | 0.1447               | HVLT               | -1.964         | [-4.504, -0.510] | 0.1225               |
| LNS                | -1.489       | [-4.413, 1.313]  | 0.3053               | LNS                | -1.673         | [-4.516, 1.068]  | 0.2377               |
| MoCA               | 1.107        | [-1.120, 3.473]  | 0.3410               | MoCA               | 1.175          | [-1.028, 3.524]  | 0.3082               |
| QUIP               | 1.433        | [-0.756, 3.358]  | 0.1623               | QUIP               | 1.441          | [-0.746, 3.363]  | 0.1595               |
| RBD                | -1.266       | [-3.456, 0.759]  | 0.2363               | RBD                | -1.303         | [-3.482, 0.708]  | 0.2200               |
| SCOPA-AUT          | -3.826       | [-7.696, -0.349] | 0.0396 <sup>#</sup>  | SCOPA-AUT          | -3.604         | [-7.407, -0.235] | 0.0470 <sup>#</sup>  |
| Semantic Fluency   | 0.555        | [-3.000, 3.962]  | 0.7531               | Semantic Fluency   | 0.527          | [-3.020, 3.925]  | 0.7648               |
| STAI               | -4.205       | [-7.213, -1.441] | 0.0041 <sup>#</sup>  | STAI               | -4.289         | [-7.278, -1.552] | 0.0031 <sup>#</sup>  |
| SDM                | 3.054        | [-0.825, 6.934]  | 0.1204               | SDM                | 2.649          | [-0.900, 6.249]  | 0.1440               |
| CAUDATE.RIGHT*     | 5.915        | [1.191, 10.890]  | 0.0160 <sup>#</sup>  | CAUDATE.RIGHT*     | 5.744          | [1.078, 10.639]  | 0.0177 <sup>#</sup>  |
| CAUDATE.LEFT*      | -6.080       | [-10.716,-1.639] | 0.0082 <sup>#</sup>  | CAUDATE.LEFT*      | -6.016         | [-10.629,-1.599] | 0.0085 <sup>#</sup>  |
| PUTAMEN.RIGHT*     | -0.156       | [-3.945, 3.500]  | 0.9340               | PUTAMEN.RIGHT*     | -0.059         | [-3.811, 3.570]  | 0.9746               |
| PUTAMEN.LEFT*      | 9.115        | [5.057, 13.562]  | <0.0001 <sup>#</sup> | PUTAMEN.LEFT*      | 9.115          | [5.069, 13.547]  | <0.0001 <sup>#</sup> |
| Duration           | 1.538        | [-0.521, 3.500]  | 0.1298               | Duration           | 1.581          | [-0.460, 3.533]  | 0.1168               |
| Education          | 1.160        | [-1.704, 4.082]  | 0.4287               | Education          | 1.328          | [-1.479, 4.182]  | 0.3546               |
| HY                 | -0.584       | [-1.616, 0.406]  | 0.2542               | HY                 | -0.541         | [-1.556, 0.435]  | 0.2835               |
| MCI                | -0.040       | [-1.555, 1.279]  | 0.9545               | MCI                | -0.019         | [-1.517, 1.291]  | 0.9782               |

|        |       |                 |        |        |       |                 |        |
|--------|-------|-----------------|--------|--------|-------|-----------------|--------|
| Gender | 0.417 | [-0.450, 1.320] | 0.3518 | Gender | 0.404 | [-0.463, 1.306] | 0.3681 |
|--------|-------|-----------------|--------|--------|-------|-----------------|--------|

# Statistical significant correlation (p-value<0.05); \* LEFT/RIGH means left/right Caudate or Putamen.

**Table 7: Multivariate logistic regression model to find discriminant clinical predictors of Subtype III patients at baseline.**

| Age adjusted       |             |                 |                      | Age unadjusted     |             |                  |                      |
|--------------------|-------------|-----------------|----------------------|--------------------|-------------|------------------|----------------------|
| variables          | coefficient | 95% CI          | p-value              | variables          | coefficient | 95% CI           | p-value              |
| Age                | 1.465       | [-0.745,3.749]  | 0.1995               |                    |             |                  |                      |
| MDS-UPDRS Part I   | 2.696       | [0.349,5.109]   | 0.0256 <sup>#</sup>  | MDS-UPDRS Part I   | 0.119       | [0.013, 0.229]   | 0.0286 <sup>#</sup>  |
| MDS-UPDRS Part II  | 0.752       | [-1.488,3.021]  | 0.5101               | MDS-UPDRS Part II  | 0.033       | [-0.058,0.128]   | 0.4734               |
| MDS-UPDRS Part III | 1.573       | [-1.002,4.261]  | 0.2395               | MDS-UPDRS Part III | 0.026       | [-0.020, 0.755]  | 0.2745               |
| BJLO               | -2.457      | [-4.448,-0.513] | 0.0138 <sup>#</sup>  | BJLO               | -0.107      | [-0.192,-0.024]  | 0.0118 <sup>#</sup>  |
| ESS                | 1.037       | [-0.948,3.078]  | 0.3108               | ESS                | 0.047       | [-0.051,0.149]   | 0.3462               |
| GDS                | 0.549       | [-1.788,2.905]  | 0.6449               | GDS                | 0.042       | [-0.188, 0.274]  | 0.7176               |
| HVLT               | -4.768      | [-7.053,-2.624] | <0.0001 <sup>#</sup> | HVLT               | -0.182      | [-0.266, -0.103] | <0.0001 <sup>#</sup> |
| LNS                | 0.338       | [-2.159,2.835]  | 0.7895               | LNS                | -0.001      | [-0.143, 0.141]  | 0.9900               |
| MoCA               | -0.141      | [-2.200,1.908]  | 0.8925               | MoCA               | -0.009      | [-0.167, 0.147]  | 0.9039               |
| QUIP               | -0.510      | [-2.280,1.238]  | 0.5668               | QUIP               | -0.247      | [-1.127, 0.624]  | 0.5778               |
| RBD                | 1.352       | [-0.039, 2.767] | 0.0580               | RBD                | 0.111       | [-0.014,0.239]   | 0.0828               |
| SCOPA-AUT          | 3.891       | [1.257,6.703]   | 0.0049 <sup>#</sup>  | SCOPA-AUT          | 0.109       | [0.046,0.177]    | 0.0011 <sup>#</sup>  |
| SDM                | -4.766      | [-8.302,-1.471] | 0.0060 <sup>#</sup>  | SDM                | -0.072      | [-0.118,-0.030]  | 0.0013 <sup>#</sup>  |
| Semantic Fluency   | -2.726      | [-5.946,0.418]  | 0.0921               | Semantic Fluency   | -0.034      | [-0.073, 0.003]  | 0.0736               |
| STAI               | 2.870       | [0.773,5.053]   | 0.0082 <sup>#</sup>  | STAI               | 0.026       | [0.006, 0.048]   | 0.0144 <sup>#</sup>  |
| CAUDATE.LEFT*      | 1.188       | [-2.903,5.332]  | 0.5699               | CAUDATE.LEFT*      | 0.397       | [-0.824,1.636]   | 0.5249               |
| CAUDATE.RIGHT*     | -2.229      | [-6.357,1.820]  | 0.2830               | CAUDATE.RIGHT*     | -0.707      | [-1.860,0.425]   | 0.2228               |
| PUTAMEN.LEFT*      | -4.510      | [-8.870,-0.240] | 0.0397 <sup>#</sup>  | PUTAMEN.LEFT*      | -1.799      | [-3.540, -0.096] | 0.0396 <sup>#</sup>  |
| PUTAMEN.RIGHT*     | -3.037      | [-6.876, 0.654] | 0.1121               | PUTAMEN.RIGHT*     | -1.200      | [-2.787, 0.328]  | 0.1292               |
| Duration           | 0.575       | [-1.247, 2.353] | 0.5279               | Duration           | 0.018       | [-0.030, 0.067]  | 0.4381               |
| Education          | 0.796       | [-1.680,3.280]  | 0.5271               | Education          | 0.049       | [-0.066, 0.166]  | 0.4034               |
| HY                 | -0.048      | [-0.844,0.734]  | 0.9034               | HY                 | -0.012      | [-0.802, 0.766]  | 0.9762               |
| MCI                | -0.050      | [-0.911,0.808]  | 0.9070               | MCI                | -0.032      | [-0.893, 0.829]  | 0.9417               |
| Gender             | -0.258      | [-1.013,0.491]  | 0.4986               | Gender             | -0.283      | [-1.033, 0.462]  | 0.4568               |

# Statistical significant correlation (p-value<0.05); \* LEFT/RIGH means left/right Caudate or Putamen.

**Table 8: Multivariate logistic regression model to find discriminant clinical predictors of Subtype I patients at last records.**

| Age adjusted |             |        |         | Age unadjusted |             |        |         |
|--------------|-------------|--------|---------|----------------|-------------|--------|---------|
| variables    | coefficient | 95% CI | p-value | variables      | coefficient | 95% CI | p-value |



|                      |               |                        |                      |                    |               |                        |                           |
|----------------------|---------------|------------------------|----------------------|--------------------|---------------|------------------------|---------------------------|
| Age                  | 0.009         | [-1.867, 1.904]        | 0.9920               |                    |               |                        |                           |
| MDS-UPDRS Part I     | -2.239        | [-4.826, 0.255]        | 0.0832               | MDS-UPDRS Part I   | -2.239        | [-4.826, 0.253]        | 0.0832                    |
| MDS-UPDRS Part II    | -2.082        | [-4.976, 0.747]        | 0.1521               | MDS-UPDRS Part II  | -2.083        | [-4.968, 0.736]        | 0.1506                    |
| MDS-UPDRS Part III   | -1.629        | [-3.834, 0.495]        | 0.1388               | MDS-UPDRS Part III | -1.629        | [-3.831, 0.493]        | 0.1385                    |
| BJLO                 | 2.098         | [0.094, 4.187]         | 0.0436 <sup>#</sup>  | BJLO               | 2.097         | [0.097, 4.184]         | 0.0434 <sup>#</sup>       |
| ESS                  | -1.426        | [-3.337, 0.474]        | 0.1404               | ESS                | -1.427        | [-3.330, 0.465]        | 0.1384                    |
| GDS                  | -1.971        | [-4.469, 0.491]        | 0.1173               | GDS                | -1.973        | [-4.448, 0.470]        | 0.1138                    |
| HVLT                 | 3.900         | [1.840, 6.046]         | 0.0002 <sup>#</sup>  | HVLT               | 3.899         | [1.841, 6.045]         | 0.0002 <sup>#</sup>       |
| LNS                  | 1.679         | [-0.907, 4.385]        | 0.2117               | LNS                | 1.677         | [-0.885, 4.349]        | 0.2074                    |
| MoCA                 | 2.745         | [-0.697, 6.305]        | 0.1228               | MoCA               | 2.744         | [-0.696, 6.299]        | 0.1225                    |
| QUIP                 | 0.475         | [-1.347, 2.328]        | 0.6084               | QUIP               | 0.475         | [-1.346, 2.328]        | 0.6082                    |
| <b>RBD</b>           | <b>-1.424</b> | <b>[-2.882,-0.005]</b> | <b>0.0514</b>        | <b>RBD</b>         | <b>-1.424</b> | <b>[-2.872,-0.016]</b> | <b>0.0496<sup>#</sup></b> |
| SCOPA-AUT            | -0.472        | [-2.936, 1.946]        | 0.7032               | SCOPA-AUT          | -0.469        | [-2.862, 1.874]        | 0.6964                    |
| Semantic Fluency     | 2.857         | [0.347, 5.478]         | 0.0284 <sup>#</sup>  | Semantic Fluency   | 2.857         | [0.349, 5.476]         | 0.0283 <sup>#</sup>       |
| STAI                 | -1.022        | [-2.926, 0.873]        | 0.2895               | STAI               | -1.023        | [-2.915, 0.859]        | 0.2858                    |
| SDM                  | 4.399         | [0.462, 8.463]         | 0.0306 <sup>#</sup>  | SDM                | 4.393         | [0.630, 8.282]         | 0.0239 <sup>#</sup>       |
| CAUDATE.RIGHT*       | 0.425         | [-3.119, 3.992]        | 0.8138               | CAUDATE.RIGHT*     | 0.423         | [-3.099, 3.970]        | 0.8136                    |
| CAUDATE.LEFT*        | 3.417         | [-0.439, 7.367]        | 0.0849               | CAUDATE.LEFT*      | 3.418         | [-0.436, 7.365]        | 0.0847                    |
| PUTAMEN.RIGHT*       | -1.061        | [-4.921, 2.739]        | 0.5864               | PUTAMEN.RIGHT*     | -1.059        | [-4.892, 2.711]        | 0.5844                    |
| PUTAMEN.LEFT*        | -4.386        | [-8.295, -0.594]       | 0.0249 <sup>#</sup>  | PUTAMEN.LEFT*      | -4.387        | [-8.291, -0.599]       | 0.0247 <sup>#</sup>       |
| Duration             | -0.863        | [-2.548, 0.851]        | 0.3168               | Duration           | -0.863        | [-2.546, 0.851]        | 0.3167                    |
| Education            | -0.486        | [-2.819, 1.877]        | 0.6836               | Education          | -0.485        | [-2.811, 1.871]        | 0.6833                    |
| HY                   | 0.029         | [-0.585, 0.648]        | 0.9244               | HY                 | 0.029         | [-0.583, 0.647]        | 0.9236                    |
| MCI                  | 0.513         | [-0.247, 1.298]        | 0.1907               | MCI                | 0.514         | [-0.246, 1.298]        | 0.1900                    |
| Gender               | 0.502         | [-0.221, 1.239]        | 0.1761               | Gender             | 0.502         | [-0.221, 1.239]        | 0.1761                    |
| MED-USE <sup>a</sup> | 2.296         | [1.263, 3.393]         | <0.0001 <sup>#</sup> | MED-USE            | 2.295         | [1.272, 3.384]         | <0.0001 <sup>#</sup>      |

<sup>#</sup> Statistical significant correlation (p-value<0.05); \* LEFT/RIGH means left/right Caudate or Putamen; Bold variables are p-values changed from significant (not significant) to not significant (significant), with/without Age adjustment; <sup>a</sup> Medication Use defined by 0=Unmedicated for PD, 1=Levodopa, 2=Dopamine Agonist, 3=Other, 4=Levodopa & Other, 5=Levodopa & Dopamine Agonist, 6=Dopamine Agonist & Other, 7=Levodopa & Dopamine Agonist & Other.

**Table 9: Multivariate logistic regression model to find discriminant clinical predictors of Subtype II patients at last records.**

| Age adjusted   |             |                 |         | Age unadjusted |             |                 |         |
|----------------|-------------|-----------------|---------|----------------|-------------|-----------------|---------|
| variables      | coefficient | 95% CI          | p-value | variables      | coefficient | 95% CI          | p-value |
| Age            | 0.326       | [-2.237, 2.928] | 0.8031  |                |             |                 |         |
| MDS-UPDRS Part | 0.903       | [-2.918, 4.618] | 0.6335  | MDS-UPDRS Part | 0.938       | [-2.871, 4.644] | 0.6197  |

| I                          |        |                   |                      | I                          |        |                   |                      |
|----------------------------|--------|-------------------|----------------------|----------------------------|--------|-------------------|----------------------|
| MDS-UPDRS Part II          | -2.043 | [-6.874, 2.365]   | 0.3823               | MDS-UPDRS Part II          | -2.021 | [-6.83, 2.374]    | 0.3858               |
| MDS-UPDRS Part III         | 1.493  | [-1.868, 4.826]   | 0.3766               | MDS-UPDRS Part III         | 1.450  | [-1.89, 4.745]    | 0.3861               |
| BJLO                       | -2.333 | [-4.882, 0.142]   | 0.0654               | BJLO                       | -2.350 | [-4.899, 0.129]   | 0.0638               |
| ESS                        | -0.192 | [-2.969, 2.502]   | 0.8894               | ESS                        | -0.227 | [-2.990, 2.451]   | 0.8689               |
| GDS                        | 0.469  | [-3.396, 4.337]   | 0.8106               | GDS                        | 0.424  | [-3.424, 4.268]   | 0.8276               |
| HVLT                       | -5.245 | [-9.095, -1.683]  | 0.0051 <sup>#</sup>  | HVLT                       | -5.224 | [-9.049, -1.676]  | 0.0051 <sup>#</sup>  |
| LNS                        | -0.434 | [-4.569, 3.605]   | 0.8334               | LNS                        | -0.468 | [-4.591, 3.564]   | 0.8203               |
| MoCA                       | 4.765  | [-0.143, 10.113]  | 0.0668               | MoCA                       | 4.769  | [-0.129, 10.107]  | 0.0661               |
| QUIP                       | 2.095  | [-0.693, 4.571]   | 0.1097               | QUIP                       | 2.110  | [-0.660, 4.574]   | 0.1052               |
| RBD                        | -0.236 | [-2.598, 1.996]   | 0.8384               | RBD                        | -0.275 | [-2.618, 1.930]   | 0.8105               |
| SCOPA-AUT                  | -4.916 | [-9.330, -0.890]  | 0.0212 <sup>#</sup>  | SCOPA-AUT                  | -4.792 | [-9.076, -0.879]  | 0.0206 <sup>#</sup>  |
| Semantic Fluency           | 1.673  | [-2.518, 5.807]   | 0.4270               | Semantic Fluency           | 1.579  | [-2.546, 5.648]   | 0.4462               |
| STAI                       | -2.192 | [-5.590, 0.739]   | 0.1714               | STAI                       | -2.224 | [-5.611, 0.693]   | 0.1634               |
| SDM                        | -1.103 | [-7.329, 4.919]   | 0.7244               | SDM                        | -1.251 | [-7.375, 4.634]   | 0.6832               |
| CAUDATE.RIGHT <sup>*</sup> | 4.259  | [-0.962, 9.636]   | 0.1121               | CAUDATE.RIGHT <sup>*</sup> | 4.171  | [-1.004, 9.488]   | 0.1160               |
| CAUDATE.LEFT <sup>*</sup>  | -6.522 | [-12.918, -0.438] | 0.0390 <sup>#</sup>  | CAUDATE.LEFT <sup>*</sup>  | -6.474 | [-12.867, -0.397] | 0.0403 <sup>#</sup>  |
| PUTAMEN.RIGHT <sup>*</sup> | 1.913  | [-2.967, 6.943]   | 0.4459               | PUTAMEN.RIGHT <sup>*</sup> | 2.015  | [-2.774, 6.984]   | 0.4147               |
| PUTAMEN.LEFT <sup>*</sup>  | 9.991  | [4.621, 15.938]   | 0.0005 <sup>#</sup>  | PUTAMEN.LEFT <sup>*</sup>  | 9.940  | [4.589, 15.874]   | 0.0005 <sup>#</sup>  |
| Duration                   | 1.805  | [-0.441, 3.999]   | 0.1066               | Duration                   | 1.816  | [-0.423, 4.004]   | 0.1037               |
| Education                  | 0.601  | [-2.807, 4.019]   | 0.7277               | Education                  | 0.684  | [-2.646, 4.041]   | 0.6862               |
| HY                         | -0.838 | [-1.827, 0.110]   | 0.0869               | HY                         | -0.838 | [-1.828, 0.111]   | 0.0871               |
| MCI                        | -0.735 | [-2.140, 0.504]   | 0.2686               | MCI                        | -0.719 | [-2.117, 0.512]   | 0.2760               |
| Gender                     | -0.026 | [-1.100, 1.062]   | 0.9614               | Gender                     | -0.038 | [-1.108, 1.046]   | 0.9436               |
| MED-USE <sup>a</sup>       | -4.609 | [-6.939, -2.677]  | <0.0001 <sup>#</sup> | MED-USE                    | -4.646 | [-6.959, -2.725]  | <0.0001 <sup>#</sup> |

<sup>#</sup> Statistical significant correlation (p-value<0.05); <sup>\*</sup> LEFT/RIGHT means left/right Caudate or Putamen; <sup>a</sup> Medication Use defined by 0=Unmedicated for PD, 1=Levodopa, 2=Dopamine Agonist, 3=Other, 4=Levodopa & Other, 5=Levodopa & Dopamine Agonist, 6=Dopamine Agonist & Other, 7=Levodopa & Dopamine Agonist & Other.

**Table 10: Multivariate logistic regression model to find discriminant clinical predictors of Subtype III patients at last records.**

| Age adjusted      |             |                 |                     | Age unadjusted    |               |                 |                     |
|-------------------|-------------|-----------------|---------------------|-------------------|---------------|-----------------|---------------------|
| variables         | coefficient | 95% CI          | p-value             | variables         | coefficient t | 95% CI          | p-value             |
| Age               | 2.246       | [-0.146, 4.746] | 0.0703              |                   |               |                 |                     |
| MDS-UPDRS Part I  | 1.795       | [-0.998, 4.662] | 0.2113              | MDS-UPDRS Part I  | 1.725         | [-1.100, 4.620] | 0.2353              |
| MDS-UPDRS Part II | 3.421       | [0.253, 6.762]  | 0.0381 <sup>#</sup> | MDS-UPDRS Part II | 3.223         | [0.084, 6.512]  | 0.0480 <sup>#</sup> |

|                                   |               |                         |                           |                                  |               |                         |                     |
|-----------------------------------|---------------|-------------------------|---------------------------|----------------------------------|---------------|-------------------------|---------------------|
| MDS-UPDRS Part III                | 1.477         | [-0.907, 3.964]         | 0.2318                    | MDS-UPDRS Part III               | 1.492         | [-0.912, 4.001]         | 0.2309              |
| BJLO                              | -0.368        | [-2.642, 1.966]         | 0.7531                    | BJLO                             | -0.463        | [-2.727, 1.866]         | 0.6915              |
| ESS                               | 2.299         | [0.006, 4.649]          | 0.0508                    | ESS                              | 2.000         | [-0.243, 4.283]         | 0.0814              |
| GDS                               | 0.922         | [-1.969, 3.861]         | 0.5342                    | GDS                              | 0.756         | [-2.086, 3.621]         | 0.6025              |
| HVLT                              | -2.821        | [-5.332, -0.394]        | 0.0244 <sup>#</sup>       | HVLT                             | -3.032        | [-5.521, -0.635]        | 0.0144 <sup>#</sup> |
| LNS                               | -1.828        | [-5.051, 1.263]         | 0.2540                    | LNS                              | -2.165        | [-5.353, 0.897]         | 0.1724              |
| MoCA                              | -4.826        | [-8.710, -1.162]        | 0.0117 <sup>#</sup>       | MoCA                             | -4.540        | [-8.363, -0.915]        | 0.0163 <sup>#</sup> |
| QUIP                              | -1.524        | [-3.734, 0.632]         | 0.1673                    | QUIP                             | -1.462        | [-3.655, 0.678]         | 0.1809              |
| RBD                               | 1.576         | [0.023, 3.187]          | 0.0496 <sup>#</sup>       | RBD                              | 1.338         | [-0.184, 2.906]         | 0.0882              |
| SCOPA-AUT                         | 3.637         | [0.637, 6.827]          | 0.0205 <sup>#</sup>       | SCOPA-AUT                        | 4.119         | [1.219, 7.229]          | 0.0069 <sup>#</sup> |
| SF                                | -5.021        | [-8.295, -1.944]        | 0.0018 <sup>#</sup>       | SF                               | -4.956        | [-8.173, -1.931]        | 0.0017 <sup>#</sup> |
| STAI                              | 2.529         | [0.384, 4.740]          | 0.0219 <sup>#</sup>       | STAI                             | 2.179         | [0.077, 4.344]          | 0.0437 <sup>#</sup> |
| SDM                               | -3.197        | [-7.855, 1.345]         | 0.1714                    | SDM                              | -4.251        | [-8.765, 0.134]         | 0.0600              |
| CAUDATE.RIGHT <sup>T*</sup>       | -0.081        | [-3.974, 3.788]         | 0.9668                    | CAUDATE.RIGHT <sup>*</sup>       | -0.256        | [-4.087, 3.561]         | 0.8947              |
| CAUDATE.LEFT <sup>*</sup>         | 0.086         | [-4.458, 4.651]         | 0.9700                    | CAUDATE.LEFT <sup>*</sup>        | -0.059        | [-4.565, 4.462]         | 0.9795              |
| <b>PUTAMEN.RIGHT<sup>T*</sup></b> | <b>-5.313</b> | <b>[-10.397, -0.51]</b> | <b>0.0343<sup>#</sup></b> | <b>PUTAMEN.RIGHT<sup>*</sup></b> | <b>-4.776</b> | <b>[-9.784, -0.048]</b> | <b>0.0535</b>       |
| PUTAMEN.LEFT <sup>*</sup>         | -2.657        | [-8.128, 2.700]         | 0.3355                    | PUTAMEN.LEFT <sup>*</sup>        | -2.659        | <b>[-8.096, 2.629]</b>  | 0.3294              |
| Duration                          | 0.194         | [-1.914, 2.253]         | 0.8544                    | Duration                         | 0.136         | [-1.976, 2.197]         | 0.8978 <sup>B</sup> |
| Education                         | -0.947        | [-4.014, 2.024]         | 0.5372                    | Education                        | -0.621        | [-3.637, 2.299]         | 0.6808              |
| HY                                | 0.261         | [-0.492, 1.021]         | 0.4955                    | HY                               | 0.352         | [-0.392, 1.105]         | 0.3542              |
| MCI                               | -0.038        | [-0.881, 0.794]         | 0.9285                    | MCI                              | -0.017        | [-0.860, 0.814]         | 0.9673              |
| Gender                            | -0.945        | [-1.821, -0.103]        | 0.0302 <sup>#</sup>       | Gender                           | -0.849        | [-1.708, -0.020]        | 0.0474 <sup>#</sup> |
| MED-USE <sup>a</sup>              | 0.286         | [-0.956, 1.552]         | 0.6527                    | MED-USE <sup>a</sup>             | -0.007        | [-1.202, 1.195]         | 0.9907              |

<sup>#</sup> Statistical significant correlation (p-value<0.05); <sup>\*</sup> LEFT/RIGHT means left/right Caudate or Putamen; Bold variables are p-values changed from significant (not significant) to not significant (significant), with/without Age adjustment; <sup>a</sup> Medication Use defined by 0=Unmedicated for PD, 1=Levodopa, 2=Dopamine Agonist, 3=Other, 4=Levodopa & Other, 5=Levodopa & Dopamine Agonist, 6=Dopamine Agonist & Other, 7=Levodopa & Dopamine Agonist & Other.

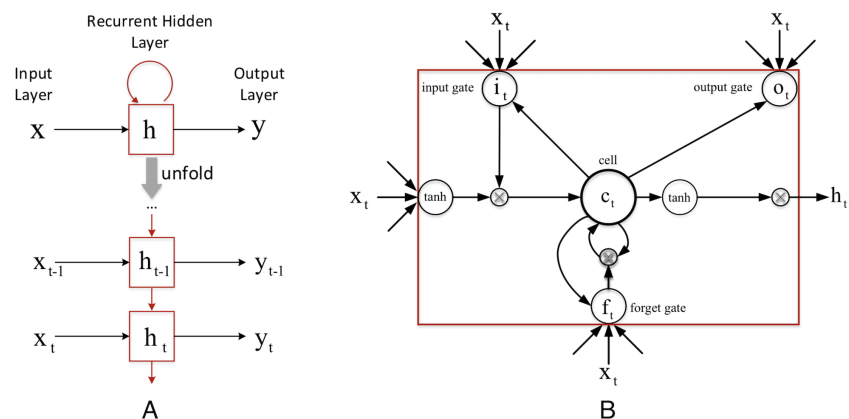

**Figure 6: The LSTM recurrent neural network. (A) the simple recurrent neural network architecture. (B) long short-term memory cell.**

Figure 4 shows the architecture of LSTM. The input vector at time step  $t$  of the  $p$ th patient can be denoted as  $x_t \in R^d, t = 1, \dots, N_p$ , where the number of unique record timestamps for the patient is  $N_p$  and  $d$  is the dimensionality input feature. The number of total records provided for the model is an aggregation of patient records  $N = \sum_p N_p$ . Each patient may have a different length of record sequences. We subsequently introduce a memory cell, which is employed in hidden layer  $h_t$  at timestamp  $t$ . We used a simplified version of the memory unit in Figure 4B. Mathematically, it is implemented by the following composite functions:

$$\begin{aligned} i_t &= \sigma(W_i x_t + W_i h_{t-1} + b_i) \\ f_t &= \sigma(W_f x_t + W_f h_{t-1} + b_f) \\ o_t &= \sigma(W_o x_t + W_o h_{t-1} + b_o) \\ c_t &= f_t * c_{t-1} + i_t * \tanh(W_c x_t + W_c h_{t-1} + b_c) \\ h_t &= o_t * \tanh(c_t) \end{aligned}$$

where  $\sigma(x) = 1/(1 + \exp(-x))$  is the logistic sigmoid function,  $i, f, o$  and  $c$  are the input gate, forget gate, output gate, and cell state, respectively. The vector  $h_t \in R^k, k \ll d$  is a compact continuous low-dimensional embedding for each input  $x_t$ . There are two types of target features: binary and continuous. We construct two different types of losses to measure the prediction performance at each time stamp. Specifically, for each timestamp  $t$ , the loss on binary dimension  $y_t^b$  is measured by the following penalized logistic loss:

$$\sum_t \sum_{j=1}^{m_b} \log(1 + \exp(-y_{t,j}^b (w_{b,j}^T h_t))) + \lambda \|W_b\|_F^2$$

where  $j$  indicates the dimension of binary target value. For continuous targets,  $y_t^g$ , the loss is measured by the following penalized square loss:

$$\frac{1}{2} \sum_t \|y_t^g - W_g h_t\|_2^2 + \lambda \|W_g\|_F^2$$

where  $y_t^g$  is the continuous part of  $y_t$ .  $\|\cdot\|_F$  is Frobenius norm. In both loss functions,  $\lambda$  is a hyperparameter to control the contribution of regularizers. The target  $y_t \in R^m$  consists of the binary part  $y_t^b$  and continuous part  $y_t^g$ . In total, the parameter collection  $\{W_i, b_i, W_f, b_f, W_o, b_o, W_c, b_c, W_g, W_b\}$  can be optimized jointly through back-propagation and mini-batch stochastic gradient descent. We implemented the algorithm using MATLAB software.
